# Supplementary material for: Acceptor–donor–acceptor-linked triphenylamine and phenothiazine motifs as cousin molecules: the methyl effect on stimuli-responsiveness, crystallochromism, and dual-state emission
Source: Royal Society of Chemistry journal article supplement (doi:10.1039/d1nj04190h), 2021-01-01
Supplement: d1nj04190h1.pdf [file d1nj04190h1.pdf]

## Supporting Information

### Acceptor-donor-acceptor-linked triphenylamine and phenothiazine motifs as cousin molecules: Methyl-effect on stimuli-responsiveness, crystallochromism and dual-state emission

Shouvik Bhui<sup>a</sup>, Suman Bhattacharya<sup>b</sup> and Manab Chakravarty<sup>a\*</sup>

<sup>a</sup>Department of Chemistry, BITS-Pilani Hyderabad campus, Jawaharnagar, Hyderabad-500078, Telangana, India;

<sup>b</sup>Department of Chemistry, University of Malta, Msida, Malta

#### Table of content

| Topic                                                                                             | Page No. |
|---------------------------------------------------------------------------------------------------|----------|
| <b>Scheme S1</b> Plausible mechanistic path for <b>MTPADCA</b> and <b>MPTZDCA</b>                 | 3        |
| <b>Scheme S2</b> Plausible mechanistic path for <b>TPADCA</b> and <b>PTZDCA</b> (newly proposed)  | 4        |
| <b>Table S1</b> Reaction Optimization                                                             | 5        |
| <b>Fig. S1</b> Solution state (a) absorption & (b) normalized emission spectra for <b>MTPADCA</b> | 6        |
| <b>Fig. S2</b> Solution state (a) absorption & (b) normalized emission spectra for <b>TPADCA</b>  | 6        |
| <b>Table S2</b> Comparison Table of emission in solution state for <b>MTPADCA</b> & <b>TPADCA</b> | 7        |
| <b>Fig. S3</b> Solvatofluorochromic behavior for <b>MTPADCA</b> & <b>TPADCA</b>                   | 7        |
| <b>Fig. S4</b> Solid state absorption spectra for <b>TPA</b> cousin molecules                     | 8        |
| <b>Fig. S5</b> Solid state absorption spectra for <b>PTZ</b> cousin molecules                     | 8        |
| <b>Fig. S6</b> Solution state (a) absorbance & (b) emission of <b>MPTZDCA</b>                     | 8        |
| <b>Fig. S7</b> Solution state (a) absorbance & (b) emission of <b>PTZDCA</b>                      | 9        |
| <b>Fig. S8</b> Solvatofluorochromic behavior for <b>MPTZDCA</b> & <b>PTZDCA</b>                   | 9        |
| <b>Table S3</b> Comparison Table of emission in solution state for <b>MPTZDCA</b> & <b>PTZDCA</b> | 9        |

|                                                                                                                                  |       |
|----------------------------------------------------------------------------------------------------------------------------------|-------|
|                                                                                                                                  |       |
| <b>Table S4</b> HOMO and LUMO for <b>MTPADCA</b> and <b>TPADCA</b> obtained from DFT studies with CAMB3LYP 6-31g (d,p) basis set | 10    |
| <b>Fig. S9</b> Fluorescence spectra of <b>MTPADCA</b> under stimuli & MIEE effect of <b>TPADCA</b>                               | 10    |
| <b>Fig. S10</b> PXRD pattern of <b>TPADCA</b> at pristine and ground state                                                       | 10    |
| <b>Table S5.</b> Intermolecular interactions in <b>MPTZDCA</b> & <b>PTZDCA</b> crystals                                          | 11    |
| <b>Fig. S11</b> IR comparison of <b>MTPADCA</b> & <b>TPADCA</b>                                                                  | 11    |
| <b>Fig. S12</b> PXRD pattern of <b>MPTZDCA</b> & <b>PTZDCA</b>                                                                   | 11    |
| <b>Fig. S13</b> PXRD pattern of (a) <b>MPTZDCA</b> & (b) <b>PTZDCA</b> after grinding the sample                                 | 12    |
| <b>Fig. S14</b> IR comparison of <b>MPTZDCA</b> & <b>PTZDCA</b>                                                                  | 12    |
| <b>Fig. S15</b> (a) DSC and (b) DTA thermogram for <b>MTPADCA</b>                                                                | 12    |
| <b>Table S6</b> Crystal Data Table                                                                                               | 13    |
| <b>Table S7</b> Lifetime data and the related parameters. $K_r = \Phi_f/\tau$ ; $K_{nr} = (1 - \Phi_f)/\tau_f$                   | 14    |
| <b>Fig. S16</b> Life time Decay profiles                                                                                         | 14-15 |
| NMR & HR-MS Spectra                                                                                                              | 16-23 |
| References                                                                                                                       | 23    |

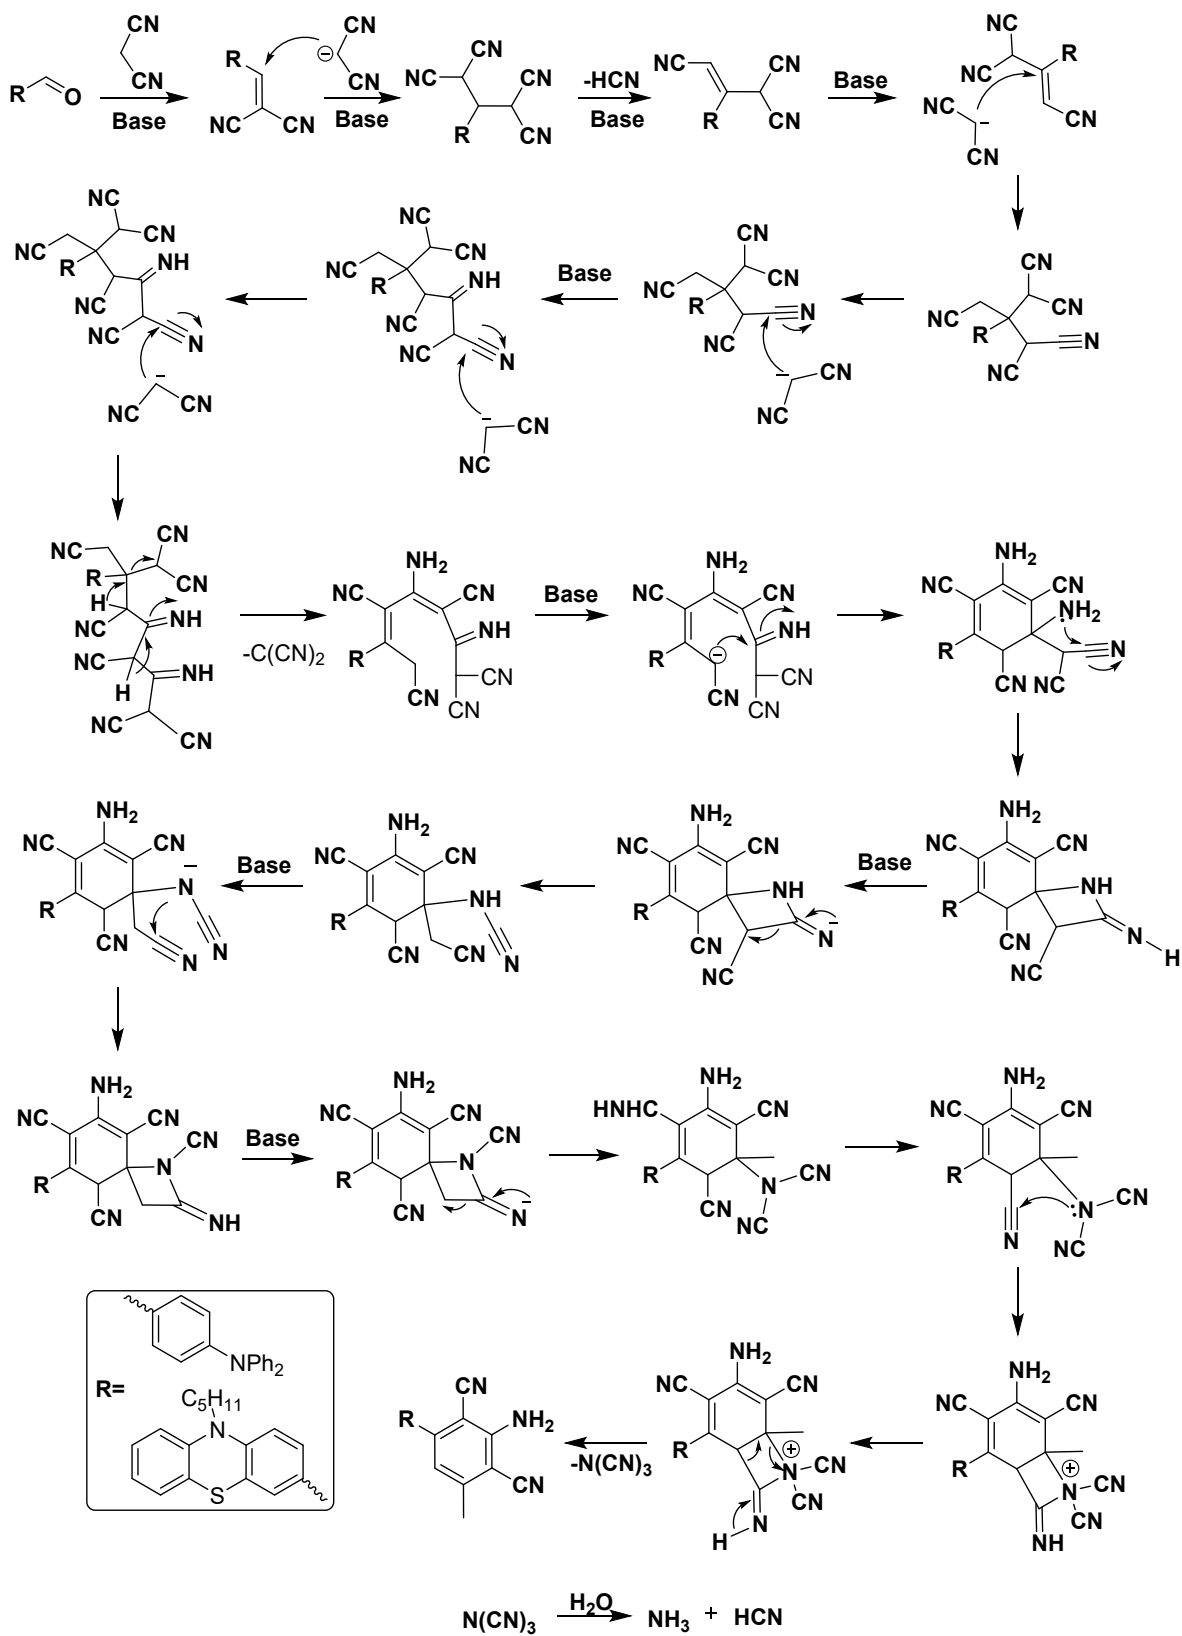

Scheme S1 Plausible mechanistic path for MTPADCA and MPTZDCA<sup>1</sup>

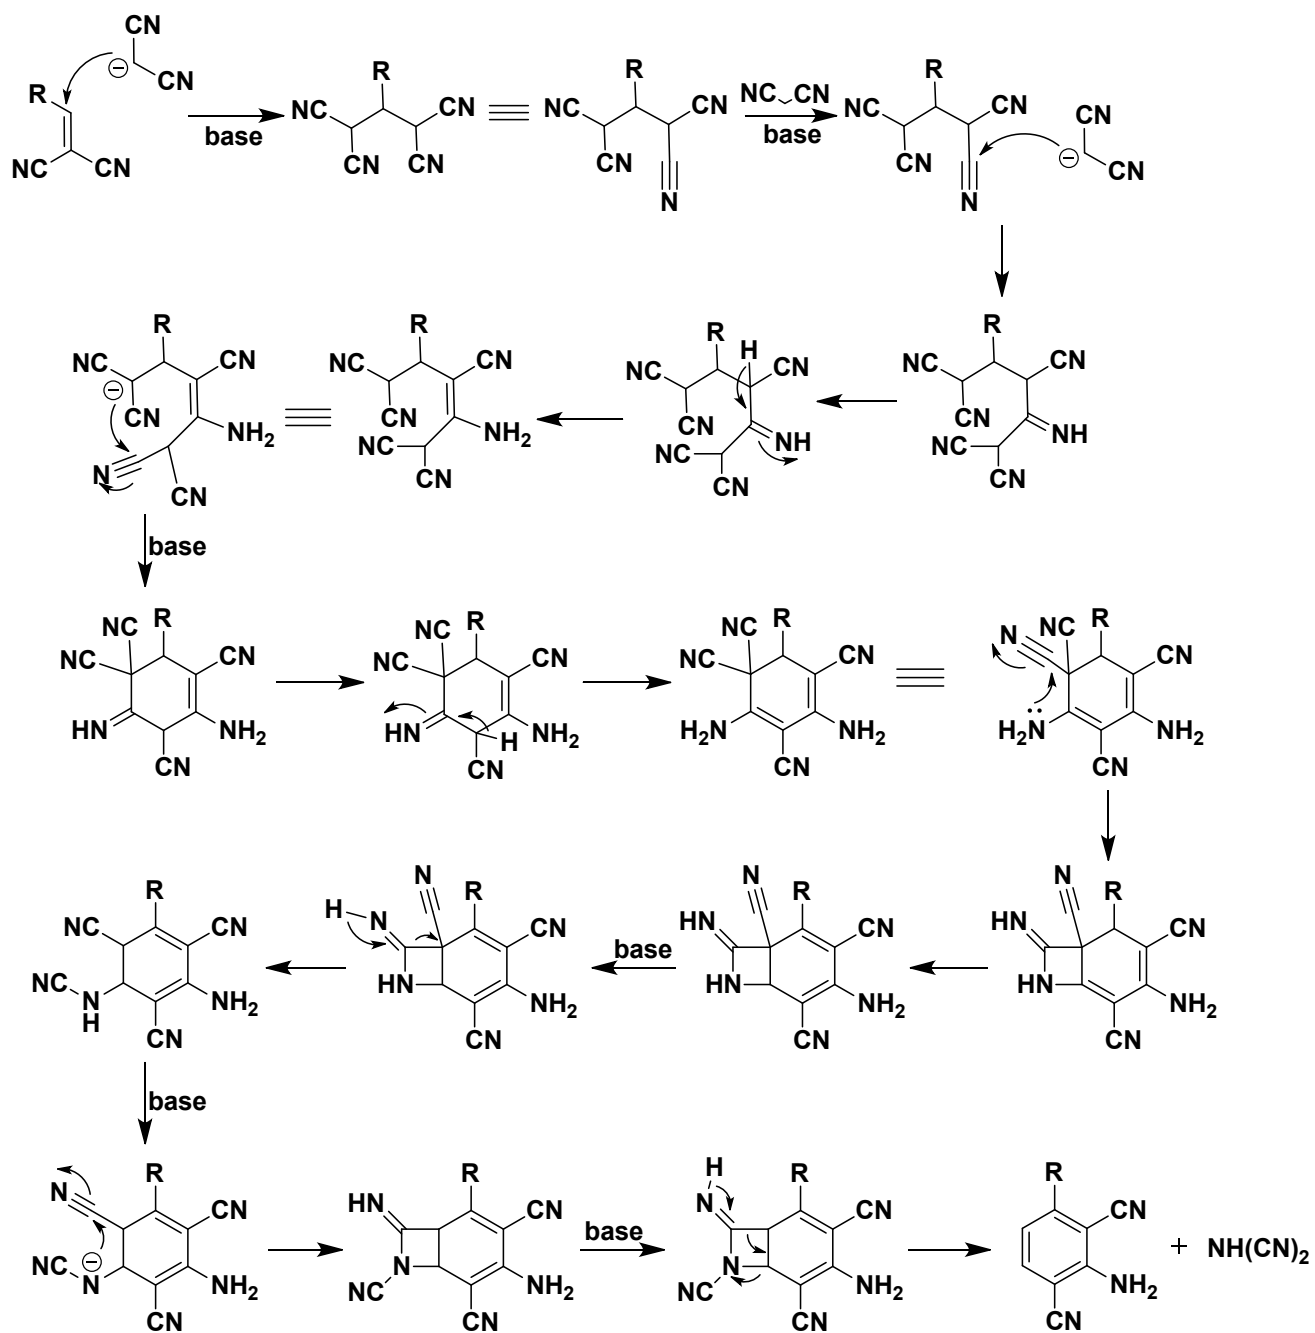

**Scheme S2** Plausible mechanistic path for TPADCA and PTZDCA (newly proposed)

**Table S1 Reaction Optimization**

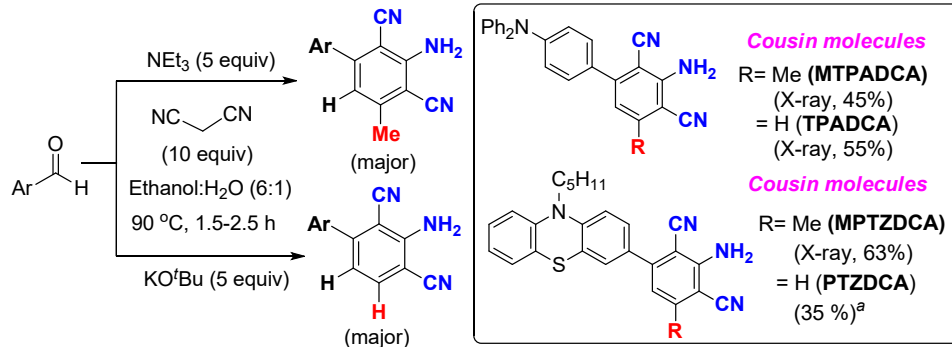

| Entry | R   | Solvent                     | Base                           | Time(h) | Methylated Pdt. (%) | Non-methylated Pdt. (%) |
|-------|-----|-----------------------------|--------------------------------|---------|---------------------|-------------------------|
| 1     | TPA | EtOH:H <sub>2</sub> O (6:1) | Et <sub>3</sub> N              | 1.5     | 45                  | 12                      |
| 2     | TPA | EtOH:H <sub>2</sub> O (6:1) | NaOH                           | 1.5     | 42                  | 52                      |
| 3     | TPA | EtOH:H <sub>2</sub> O (6:1) | KO <sup>t</sup> Bu             | 1.5     | 18                  | 55                      |
| 4     | TPA | EtOH:H <sub>2</sub> O (6:1) | K <sub>2</sub> CO <sub>3</sub> | 1.5     | 12                  | 17                      |
| 5     | TPA | EtOH:H <sub>2</sub> O (6:1) | NH <sub>4</sub> OAc            | 1.5     | Trace               | 15                      |
| 6     | TPA | EtOH:H <sub>2</sub> O (6:1) | Piperidine                     | 1.5     | 22                  | Trace                   |
| 7     | TPA | Toluene                     | Et <sub>3</sub> N              | 2.5     | 0                   | 0                       |
| 8     | TPA | Toluene                     | NaOH                           | 2.5     | 0                   | 0                       |
| 9     | TPA | Toluene                     | Piperidine                     | 2.5     | 0                   | 0                       |
| 10    | TPA | Toluene                     | Pyrrolidine                    | 2.5     | Trace               | 20                      |
| 11    | TPA | Acetonitrile                | Pyrrolidine                    | 2.5     | Trace               | Trace                   |

|    |     |                                |                   |     |       |       |
|----|-----|--------------------------------|-------------------|-----|-------|-------|
| 12 | PTZ | EtOH:H <sub>2</sub> O<br>(6:1) | Et <sub>3</sub> N | 1   | 63    | Trace |
| 13 | PTZ | EtOH:H <sub>2</sub> O<br>(6:1) | NaOH              | 1.5 | 15    | 62    |
| 14 | PTZ | EtOH:H <sub>2</sub> O<br>(6:1) | <sup>t</sup> BuOK | 1.5 | Trace | 35    |
| 15 | PTZ | EtOH:H <sub>2</sub> O<br>(6:1) | Et <sub>3</sub> N | 1.5 | 63    | 20    |
| 16 | PTZ | Acetonitrile                   | Pipyrindine       | 2.5 | 25    | Trace |

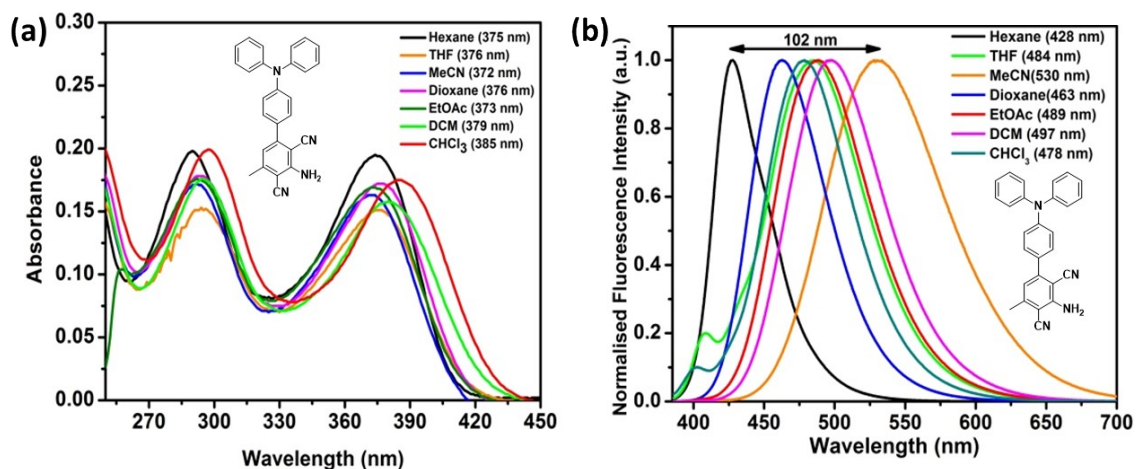

Fig. S1 Solution state (a) absorption & (b) normalized emission spectra for MTPADCA ( $10^{-5}$  M)

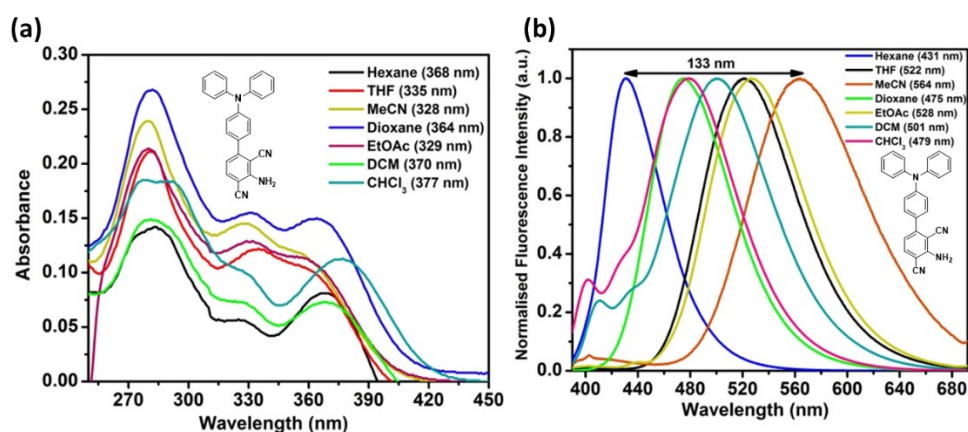

Fig. S2 Solution state (a) absorption & (b) normalized emission spectra for TPADCA ( $10^{-5}$  M)

**Table S2** Comparison Table of emission in solution state for **MTPADCA** & **TPADCA**

| Solvent<br>[ $E_T(30)$ ]    | $\lambda_{\text{abs}}$ (nm)<br><b>TPADCA</b> | $\lambda_{\text{abs}}$ (nm)<br><b>MTPADCA</b> | $\lambda_{\text{em.}}$ (nm)<br><b>TPADCA</b> | $\lambda_{\text{em.}}$ (nm)<br><b>MTPADCA</b> | Relative<br>$\Phi_f^*$ (%)<br><b>TPADCA</b> | Relative $\Phi_f^*$<br>(%)<br><b>MTPADCA</b> |
|-----------------------------|----------------------------------------------|-----------------------------------------------|----------------------------------------------|-----------------------------------------------|---------------------------------------------|----------------------------------------------|
| Hexane<br>(31)              | 368                                          | 374                                           | 431                                          | 428                                           | 35                                          | 37                                           |
| 1,4-<br>Dioxane<br>(36)     | 364                                          | 376                                           | 475                                          | 463                                           | 28                                          | 27                                           |
| THF (37.4)                  | 335                                          | 376                                           | 522                                          | 484                                           | 26                                          | 23                                           |
| EtOAc<br>(38.1)             | 329                                          | 373                                           | 528                                          | 489                                           | 26                                          | 25                                           |
| CHCl <sub>3</sub><br>(39.1) | 377                                          | 385                                           | 479                                          | 478                                           | 24                                          | 20                                           |
| DCM<br>(39.6)               | 370                                          | 379                                           | 501                                          | 497                                           | 25                                          | 24                                           |
| MeCN<br>(45.6)              | 328                                          | 372                                           | 564                                          | 530                                           | 31                                          | 29                                           |

\*Relative  $\Phi_f$  (Relative quantum yield) is calculated using coumarin-53B as a reference.

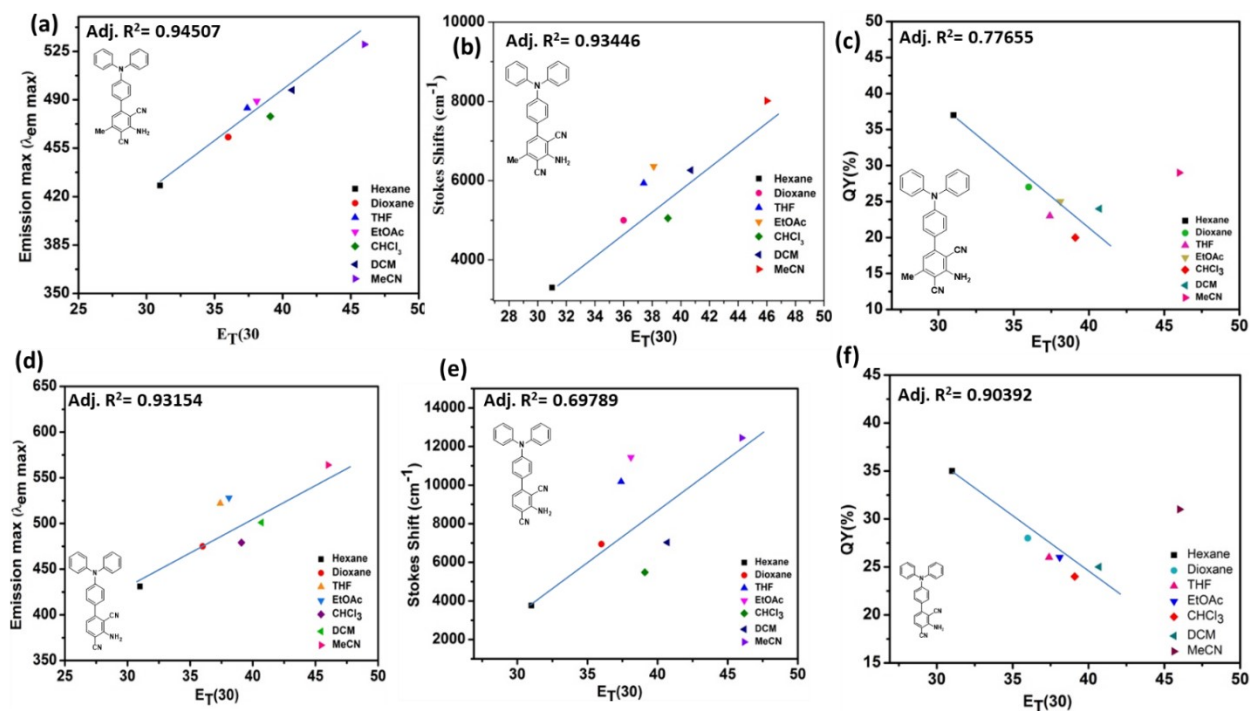

**Fig. S3** Solvatofluorochromic behavior for **MTPADCA**: (a)-(c) and **TPADCA**: (d)-(f)

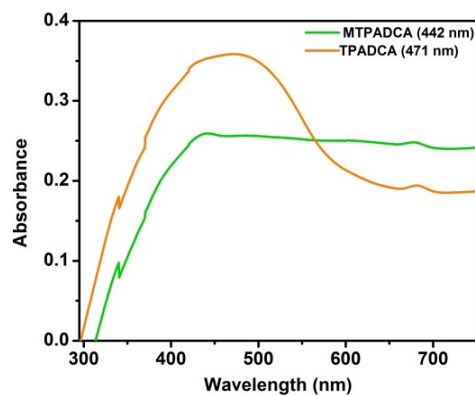

**Fig. S4** Solid state absorption spectra for TPA cousin molecules

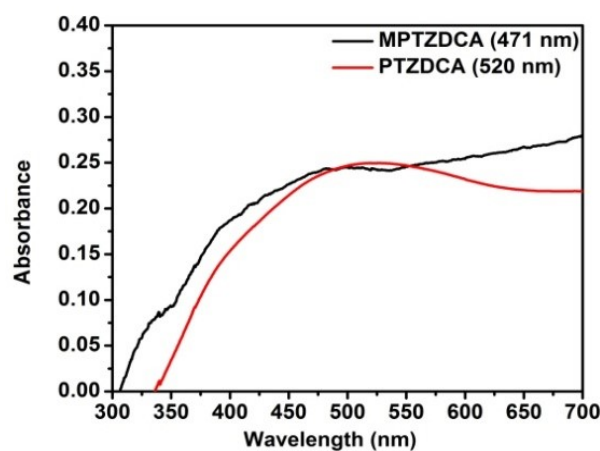

**Fig. S5** Solid state absorption spectra for PTZ cousin molecules

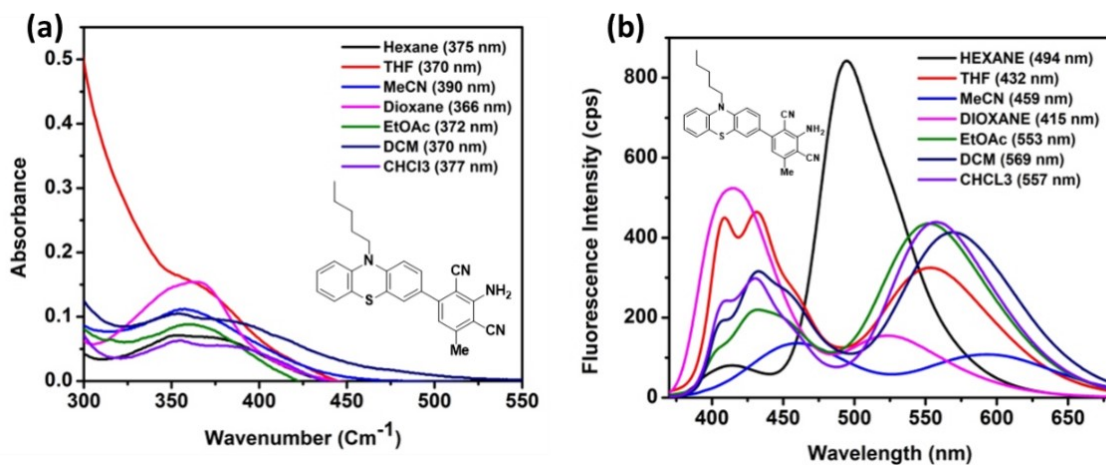

**Fig. S6** Solution state (a) absorbance & (b) emission of MPTZDCA ( $10^{-5}$  M)



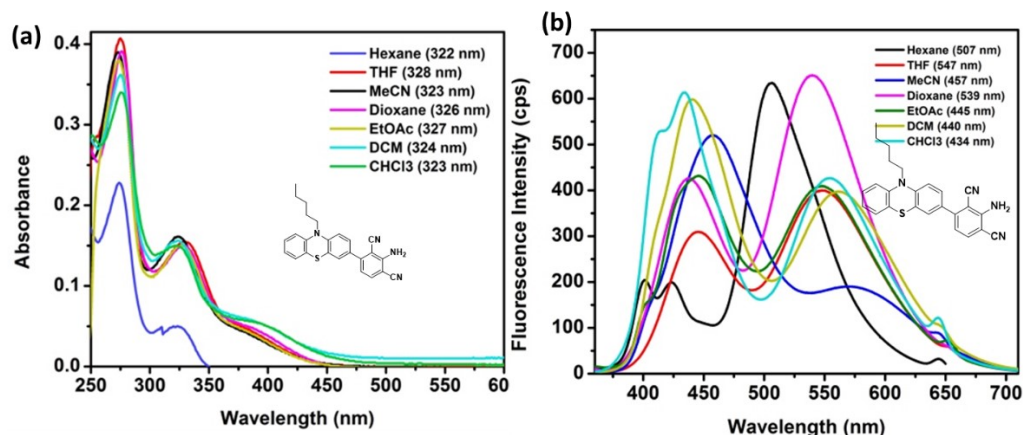

**Fig. S7** Solution state (a) absorbance & (b) emission of **PTZDCA** ( $10^{-5}$  M)

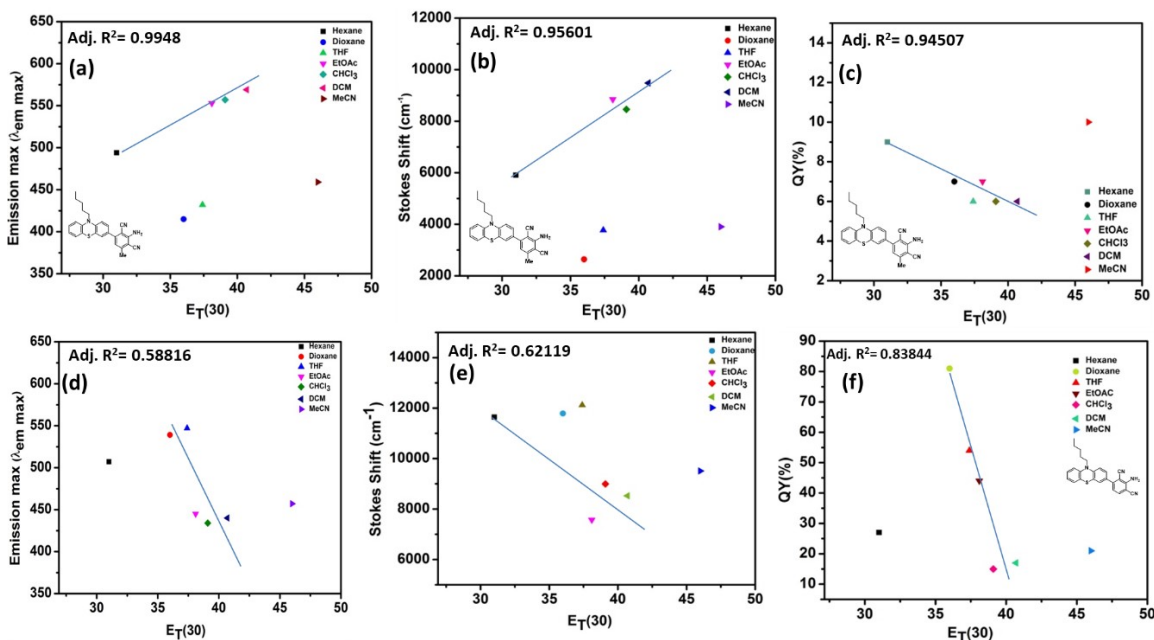

**Fig. S8** Solvatofluorochromic behavior for **MPTZDCA**: (a)-(c) and **PTZDCA**: (d)-(f)

**Table S3** Comparison Table of emission in solution state for **MPTZDCA** & **PTZDCA**; the relative quantum yields ( $\Phi_f$ ) are reported here with a standard of coumarin-53B as a reference

| Solvent ( $E_T(30)$ ) | $\lambda_{abs.}$ (nm) <b>PTZDCA</b> | $\lambda_{abs.}$ (nm) <b>MPTZDCA</b> | $\lambda_{em.}$ (nm) <b>PTZDCA</b> | $\lambda_{em.}$ (nm) <b>MPTZADCA</b> | Relative $\Phi_f$ (%) <b>PTZDCA</b> | Relative $\Phi_f$ (%) <b>MPTZDCA</b> |
|-----------------------|-------------------------------------|--------------------------------------|------------------------------------|--------------------------------------|-------------------------------------|--------------------------------------|
| Hexane (31)           | 322                                 | 375                                  | 507                                | 494                                  | 27                                  | 9                                    |
| 1,4-Dioxane (36)      | 326                                 | 366                                  | 539                                | 415                                  | 81                                  | 7                                    |
| THF (37.4)            | 328                                 | 370                                  | 547                                | 432                                  | 54                                  | 6                                    |
| EtOAc (38.1)          | 327                                 | 372                                  | 445                                | 553                                  | 44                                  | 7                                    |
| $CHCl_3$ (39.1)       | 323                                 | 377                                  | 434                                | 557                                  | 15                                  | 6                                    |

|             |     |     |     |     |    |    |
|-------------|-----|-----|-----|-----|----|----|
| DCM (39.6)  | 324 | 370 | 440 | 569 | 17 | 6  |
| MeCN (45.6) | 323 | 390 | 457 | 459 | 21 | 10 |

**Table S4** HOMO and LUMO for **MTPADCA** and **TPADCA** obtained from DFT studies with CAMB3LYP 6-31g (d,p) basis set

| Molecules      | Dipole moment (D) | HOMO (eV)    | LUMO (eV)    | Gap (eV) | $\lambda_{\text{abs}}$ | $\lambda_{\text{emi}}$ |
|----------------|-------------------|--------------|--------------|----------|------------------------|------------------------|
| <b>MTPADCA</b> | 4.482             | -6.774001926 | -1.045733486 | 5.73     | 442                    | 501                    |
| <b>TPADCA</b>  | 4.5698            | -6.814819002 | -1.138252192 | 5.68     | 471                    | 578                    |

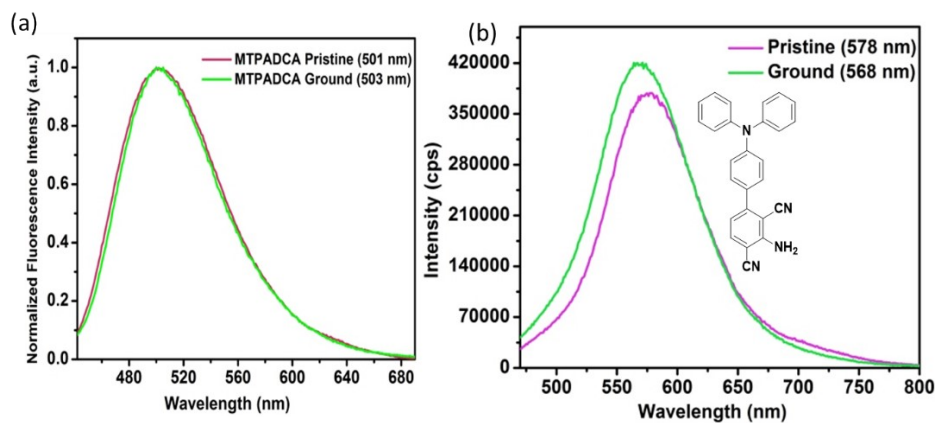

**Fig. S9** Fluorescence spectra of (a) **MTPADCA** under stimuli  $\lambda_{\text{ex}} = 442$  nm (b) MIEE- effect of **TPADCA**;  $\lambda_{\text{ex}} = 471$  nm

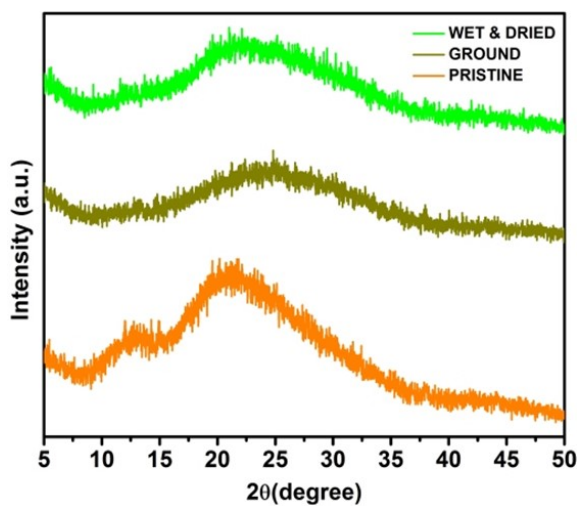

**Fig. S10** PXRD pattern of **TPADCA** at pristine and ground state

**Table S5** Intermolecular interactions in **MTPADCA**, **TPADCA** & **MPTZDCA** crystals

| Molecules                           | N...N (Å) | C-H... $\pi$ (Å)                                                      | CN...HC (Å)     | NC...C (Å)                | C $\equiv$ N...H <sub>2</sub> N (Å) | H...H (Å)      | S...H (Å) |
|-------------------------------------|-----------|-----------------------------------------------------------------------|-----------------|---------------------------|-------------------------------------|----------------|-----------|
| <b>MTPADCA</b>                      | 3.082     | 2.803                                                                 | 2.690,<br>2.687 | 3.362                     | 2.331                               | 2.189          |           |
| <b>TPADCA</b>                       | -         | 2.808                                                                 | 2.400           | -                         | -                                   | -              |           |
| <b>MPTZDCA</b><br>(19 interactions) | 3.013     | 2.828,<br>2.882,<br>2.760<br>2.883<br>2.886,<br>2.876,2.883,<br>2.803 | 2.580,<br>2.706 | 3.369,<br>3.381,<br>3.323 | 2.422,<br>2.456                     | 2.371<br>2.344 | 2.880     |

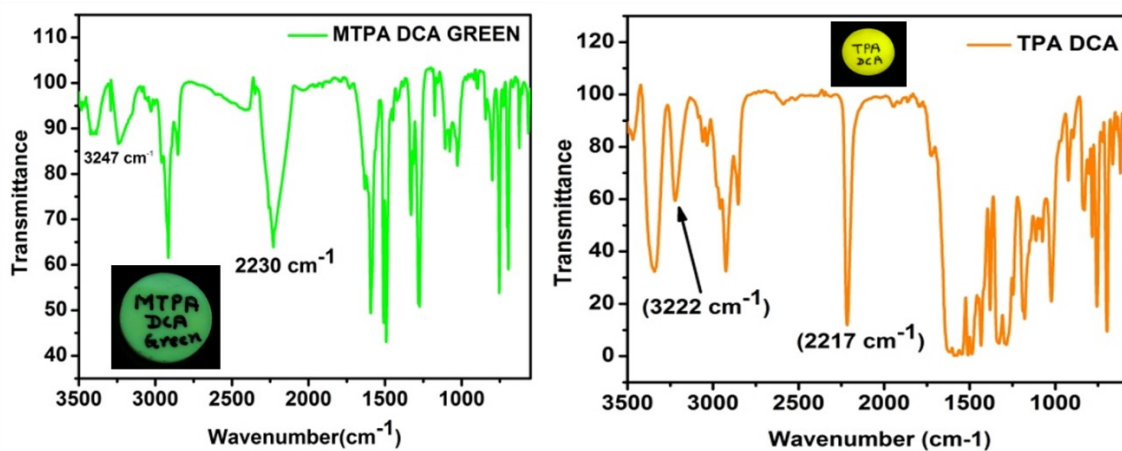

**Fig. S11** IR comparison of **MTPADCA** & **TPADCA**

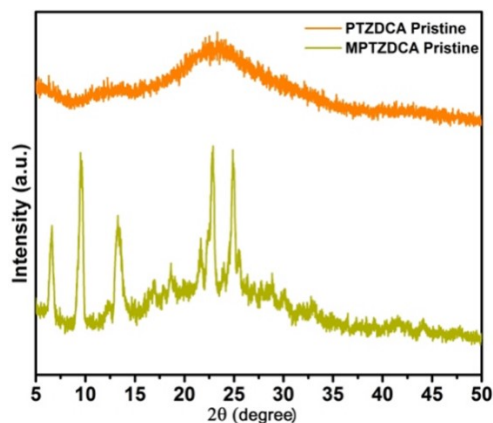

**Fig. S12** PXRD pattern of **MPTZDCA** & **PTZDCA**

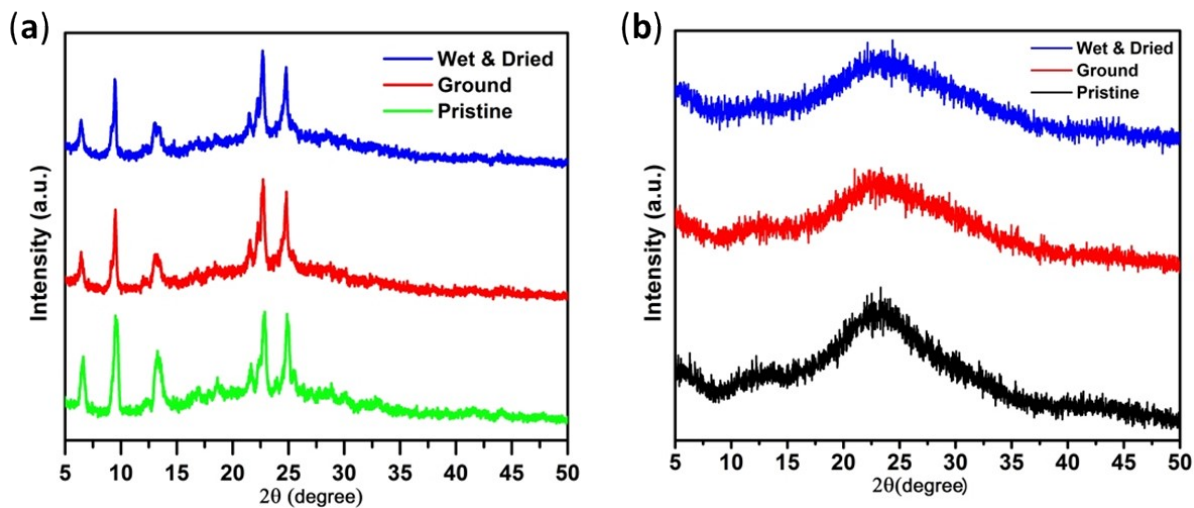

Fig. S13 PXRD pattern of (a) MPTZDCA & (b) PTZDCA after grinding the sample.

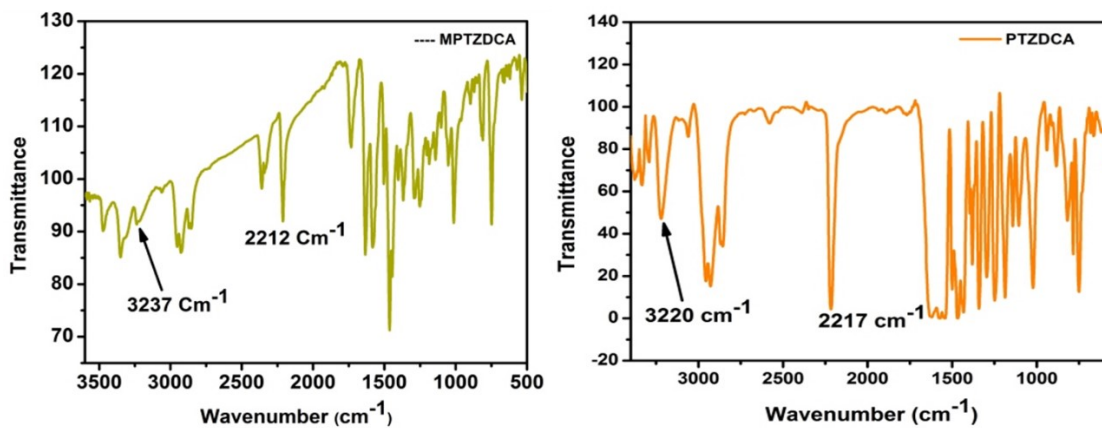

Fig. S14 IR comparison of MPTZDCA & PTZDCA

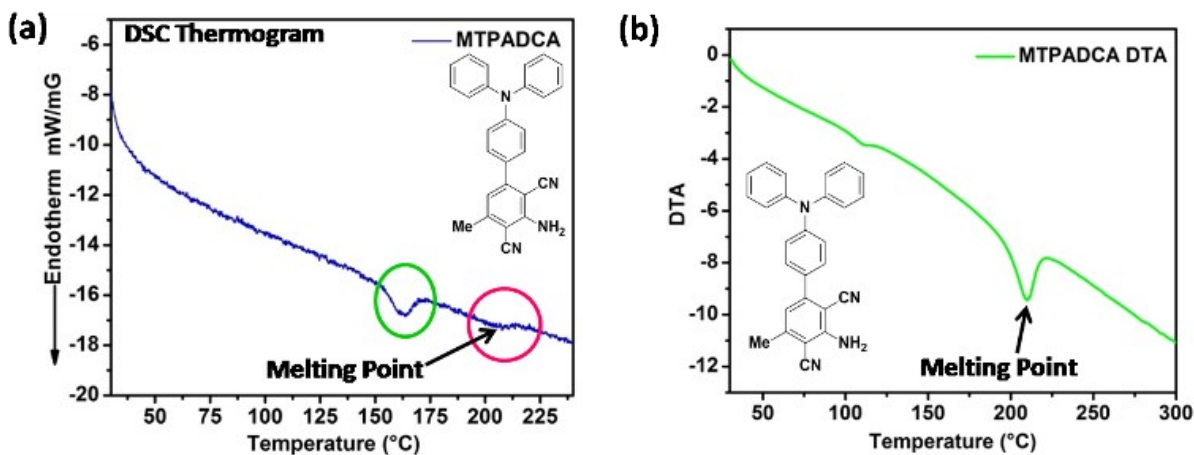

Fig. S15 (a) DSC and (b) DTA thermogram for MTPADCA

**Explanation:** As we found a quick emission color change starting at 155 °C, we closely observed the DSC feature around the temperature range (Fig. S15a). A clear endothermic peak at ~160 °C is recognized in the DSC thermogram, which indicates a phase transition and is possibly associated with the TFC behavior. The DSC thermogram does not show a sharp melting transition, implying that the compound loses crystallinity after the initial phase transition. Although a small signature appears at ~207 °C in the DSC profile, a sharp melting point at 207 °C is detected in the DTA (Differential Thermal Analysis) thermogram (Fig. S15b).

**Table S6** Crystal Data Table:

| Compounds                                             | <b>MTPADCA</b>                                 | <b>TPADCA</b>                                  | <b>MPTZDCA</b>                                   |
|-------------------------------------------------------|------------------------------------------------|------------------------------------------------|--------------------------------------------------|
| Emp. Formula                                          | C <sub>27</sub> H <sub>20</sub> N <sub>4</sub> | C <sub>26</sub> H <sub>18</sub> N <sub>4</sub> | C <sub>26</sub> H <sub>24</sub> N <sub>4</sub> S |
| Formula weight                                        | 400.47                                         | 386.44                                         | 424.55                                           |
| Crystal system                                        | monoclinic                                     | monoclinic                                     | Triclinic                                        |
| Space group                                           | <i>P2<sub>1</sub>/c</i>                        | <i>P2<sub>1</sub>/c</i>                        | P -1                                             |
| <i>a</i> /Å                                           | 10.1248(2)                                     | 17.0172(3)                                     | 8.9131(4)                                        |
| <i>b</i> /Å                                           | 9.8792(2)                                      | 14.7978(3)                                     | 11.8184(4)                                       |
| <i>c</i> /Å                                           | 21.3435(3)                                     | 8.29705(16)                                    | 21.8914(9)                                       |
| /degree                                               | 90                                             | 90                                             | 91.003(3)                                        |
| /degree                                               | 97.401(2)                                      | 98.9384(18)                                    | 95.825(4)                                        |
| /degree                                               | 90                                             | 90                                             | 106.344(4)                                       |
| <i>V</i> /Å <sup>3</sup>                              | 2117.10(7)                                     | 2063.96(7)                                     | 2198.84(16)                                      |
| <i>Z</i>                                              | 4                                              | 4                                              | 4                                                |
| <i>D</i> <sub>calc</sub> /g cm <sup>-3</sup>          | 1.216                                          | 1.244                                          | 1.282                                            |
| /mm <sup>-1</sup>                                     | .626                                           | .589                                           | 1.458                                            |
| <i>F</i> (000)                                        | 819.0                                          | 808.0                                          | 896.0                                            |
| Data/ restraints/ parameters                          | 4491/0/282                                     | 4377/0/272                                     | 10060/0/562                                      |
| <i>S</i>                                              | 1.083                                          | 1.059                                          | 1.061                                            |
| +R1 [ <i>I</i> >2( <i>I</i> )]                        | 0.0532(3974)                                   | 0.0670(3233)                                   | 0.0671(8733)                                     |
| wR2 [all data]                                        | 0.1564(4491)                                   | 0.2056(4377)                                   | 0.1933(10060)                                    |
| Max./min. residual electron dens. [eÅ <sup>-3</sup> ] | 0.320/ -0.420                                  | 0.737/ -0.192                                  | 0.785/ -0.984                                    |
| CCDC No.                                              | 2062771                                        | 2062770                                        | 2041739                                          |

**Table S7** Lifetime data (ns) and the related parameters.  $K_r = \Phi_f/\tau$ ;  $K_{nr} = (1 - \Phi_f)/\tau_f$

| Compounds               | $\tau_1$ (ns) | $\tau_2$ (ns) | $\tau_3$ (ns) | $\tau_4$ (ns) | $\alpha_1$ | $\alpha_2$ | $\alpha_3$ | $\alpha_4$ | $\chi^2$ | $\tau$ (ns) | $\Phi_f$ (%) | $k_r$ (s <sup>-1</sup> ) x 10 <sup>6</sup> | $k_{nr}$ (s <sup>-1</sup> ) x 10 <sup>6</sup> | $k_r/k_{nr}$ |
|-------------------------|---------------|---------------|---------------|---------------|------------|------------|------------|------------|----------|-------------|--------------|--------------------------------------------|-----------------------------------------------|--------------|
| MTPADC<br>A<br>Pristine | 2.838         | 12.993        | 0.848         | -             | 0.336      | 0.027      | 0.637      | -          | 1.173    | 1.844       | 25.11        | 136.171                                    | 406.128                                       | 0.335        |
| MTPADC<br>A<br>Annealed | 0.581         | 2.338         | 12.704        | 0.056         | 0.087      | 0.024      | 0.002      | 0.887      | 1.151    | 0.182       | 3.6          | 198.000                                    | 5300.000                                      | 0.037        |
| TPADCA<br>Pristine      | 2.118         | 0.223         | 6.821         | -             | 0.239      | 0.729      | 0.031      | -          | 1.197    | 0.883       | 2.79         | 31.597                                     | 1100.906                                      | 0.029        |
| TPADCA<br>Ground        | 0.649         | 0.039         | 2.669         | -             | 0.001      | .998       | 0.001      | -          | 1.085    | 0.0417      | 5.67         | 1359.712                                   | 22621.103                                     | 0.060        |
| MPTZDC<br>A<br>Pristine | 1.742         | 4.078         | 0.081         | -             | 0.059      | 0.066      | 0.874      | -          | 1.035    | 0.445       | 2.06         | 46.292                                     | 2200.899                                      | 0.021        |
| MPTZDC<br>A<br>Ground   | 0.93          | 3.638         | 0.049         | -             | 0.011      | 0.007      | 0.983      | -          | 1.103    | 0.083       | 5.81         | 700                                        | 11348.193                                     | 0.062        |
| PTZDCA<br>Pristine      | 0.049         | 3.222         | -             | -             | 0.995      | 0.005      | -          | -          | 1.065    | 0.067       | 1.45         | 216.417                                    | 14708.956                                     | 0.015        |
| PTZDCA<br>Ground        | 2.842         | 0.044         | -             | -             | 0.001      | 0.999      | -          | -          | 1.014    | 0.047       | 3.39         | 721.277                                    | 20555.319                                     | 0.035        |

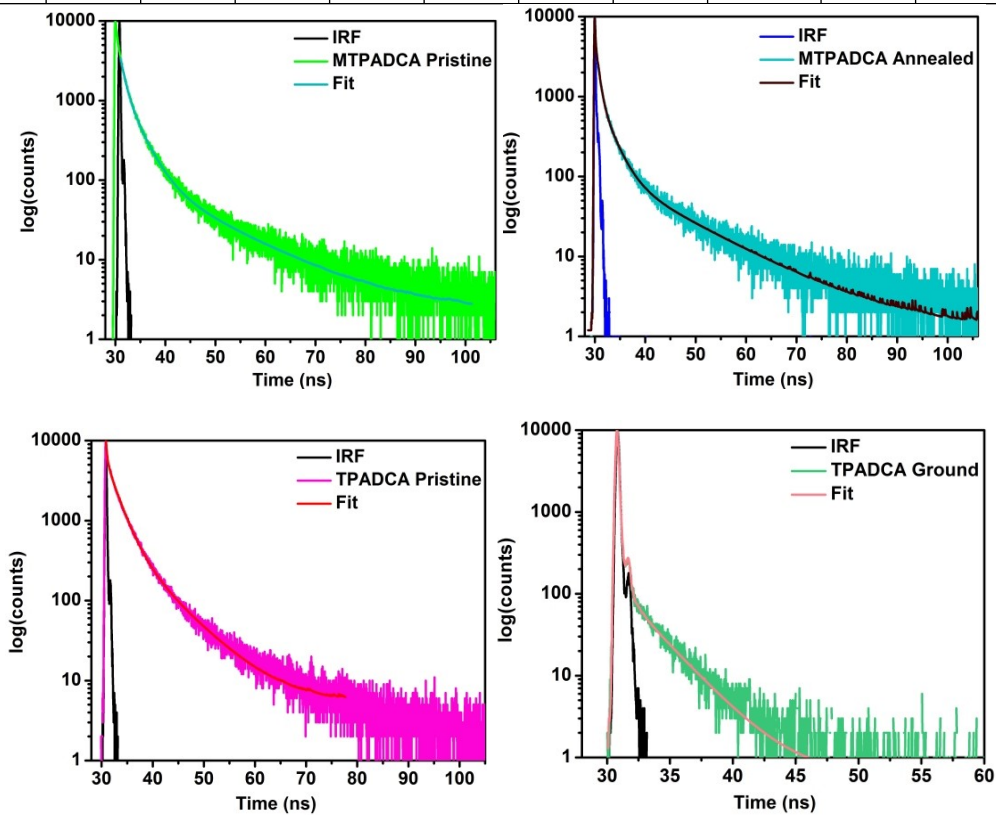

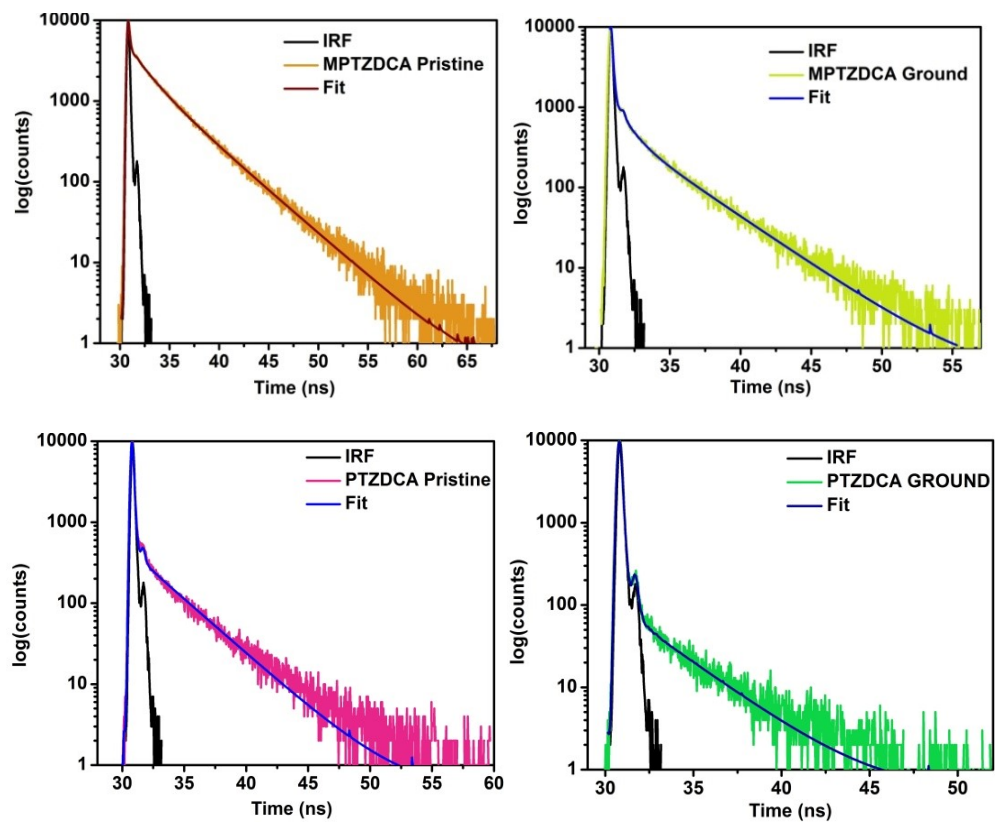

**Fig. S16** Life-time decay profiles for all the compounds as stated in the box.

## NMR Spectra:

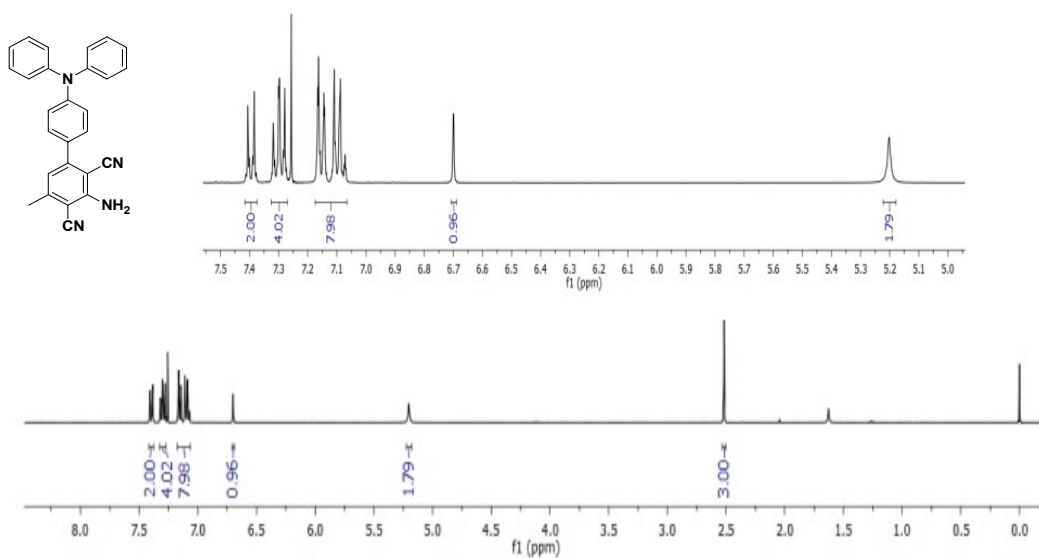

Fig. S17 <sup>1</sup>H NMR spectra of MTPADCA

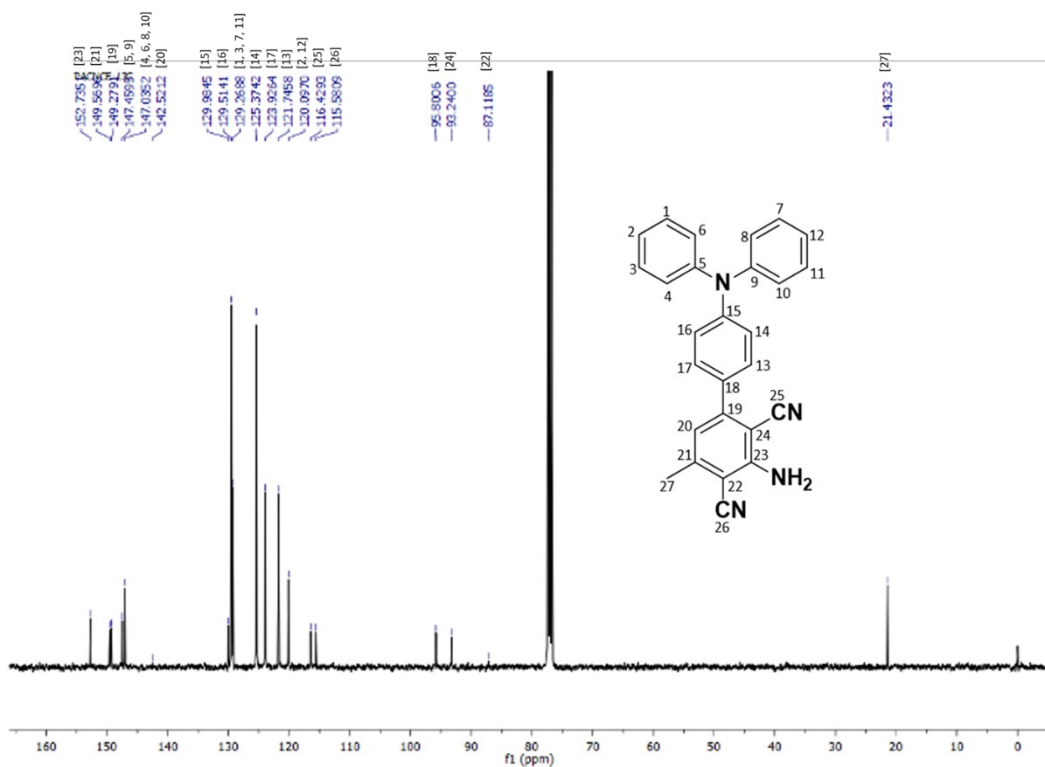

Fig. S18 <sup>13</sup>C NMR spectra of MTPADCA. The signals are assigned with the corresponding <sup>13</sup>C nuclei, and the numberings (in bracket) are given in the structure.



MC-100\_200106210637 #139 RT: 3.01 AV: 1 SB: 428 3.49-9.98 , 0.00-2.79 NL: 1.00E5

T: FTMS + p ESI Full ms [50.00-2000.00]

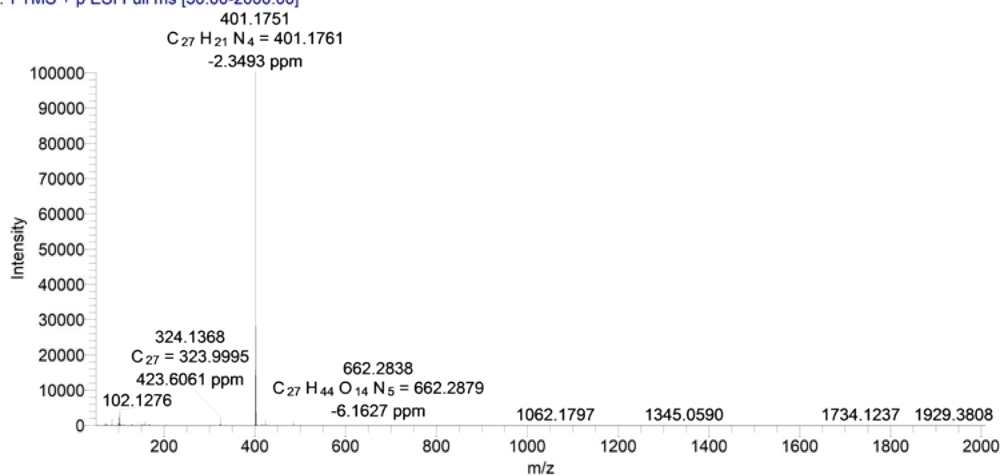

Fig. S19 HR-MS spectra of MTPADCA

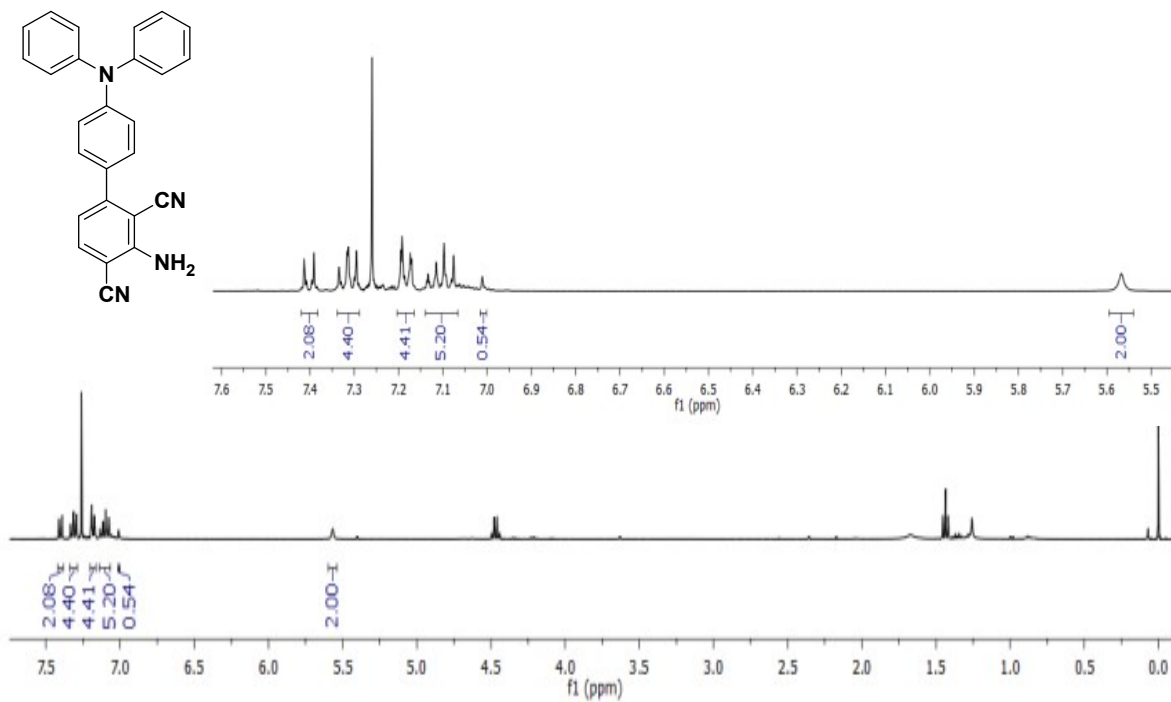

Fig. S20 <sup>1</sup>H NMR spectra of TPADCA (little adventitious solvent CH<sub>3</sub>CH<sub>2</sub>OC(O)CH<sub>3</sub> is present)

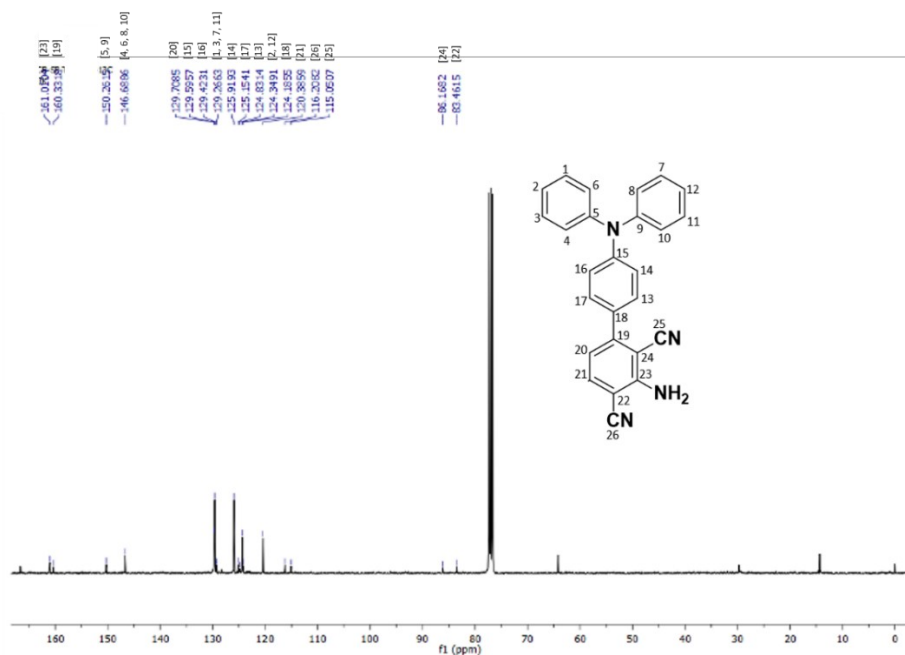

**Fig. S21**  $^{13}\text{C}$  NMR spectra of TPADCA. (Signals from adventitious solvent  $\text{CH}_3\text{CH}_2\text{OC}(\text{O})\text{CH}_3$  are assigned at  $\delta$  166.6 [ $\text{C}(\text{O})\text{CH}_3$ ], 64.1 ( $\text{OCH}_2$ ), 22.1 [ $\text{C}(\text{O})\text{CH}_3$ ], 14.5 ( $\text{CH}_3\text{CH}_2\text{O}^-$ ). The signals are assigned with the corresponding  $^{13}\text{C}$  nuclei, and the numberings (in bracket) are given in the structure.

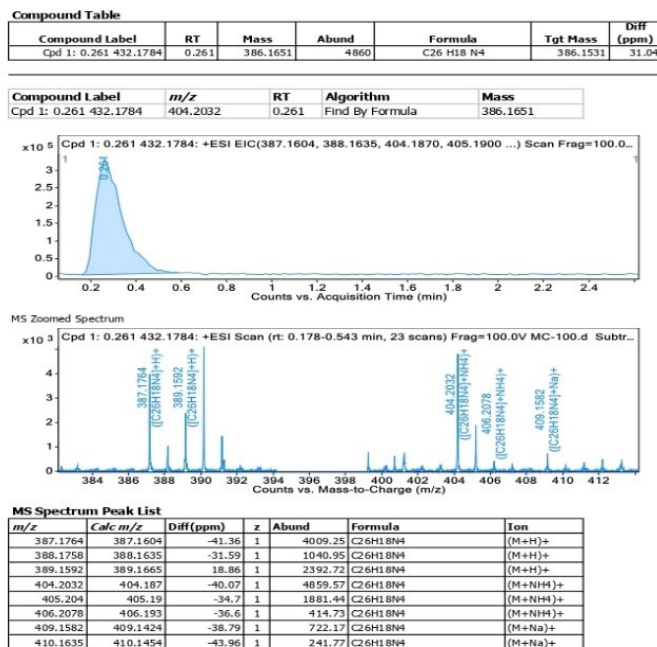

**Fig. S22** HR-MS spectra of TPADCA

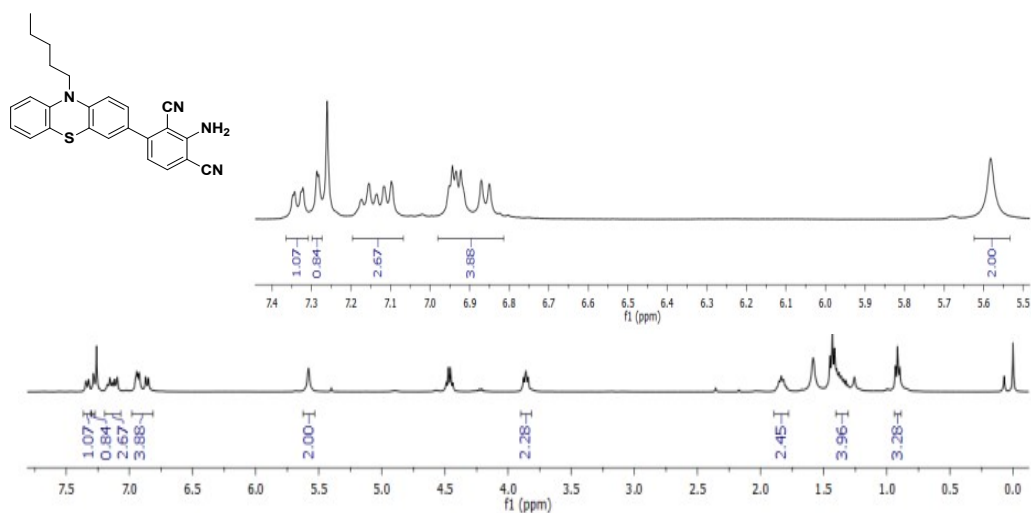

**Fig. S23**  $^1\text{H}$  NMR spectra of PTZDCA (adventitious solvent  $\text{CH}_3\text{CH}_2\text{OC}(\text{O})\text{CH}_3$  is present)

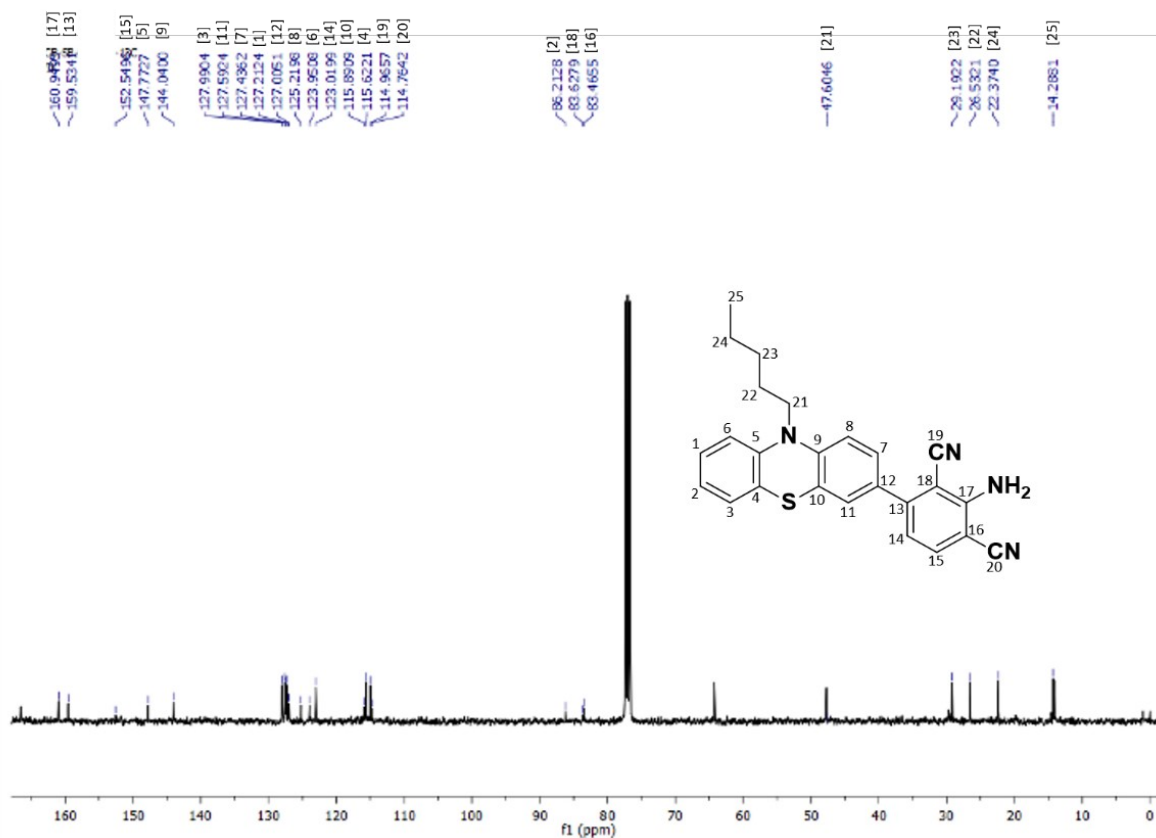

**Fig. S24**  $^{13}\text{C}$ -NMR spectra of PTZDCA. The signals are assigned with the corresponding  $^{13}\text{C}$  nuclei, and the numberings (in bracket) are given in the structure. Signals due to adventitious solvent  $\text{CH}_3\text{CH}_2\text{OC}(\text{O})\text{CH}_3$  are assigned at  $\delta$  166.6 [ $\text{C}(\text{O})\text{CH}_3$ ], 64.1 ( $\text{OCH}_2$ ), 22.1 [ $\text{C}(\text{O})\text{CH}_3$ ], 14.5 ( $\text{CH}_3\text{CH}_2\text{O}$ ).

**Compound Table**

| Compound Label       | RT    | Mass     | Abund | Formula      | Tgt Mass | Diff (ppm) |
|----------------------|-------|----------|-------|--------------|----------|------------|
| Cpd 1: 0.706 89.0601 | 0.706 | 410.1565 | 58    | C25 H22 N4 S | 410.1565 | 0.02       |

| Compound Label       | m/z      | RT    | Algorithm       | Mass     |
|----------------------|----------|-------|-----------------|----------|
| Cpd 1: 0.706 89.0601 | 411.1638 | 0.706 | Find By Formula | 410.1565 |

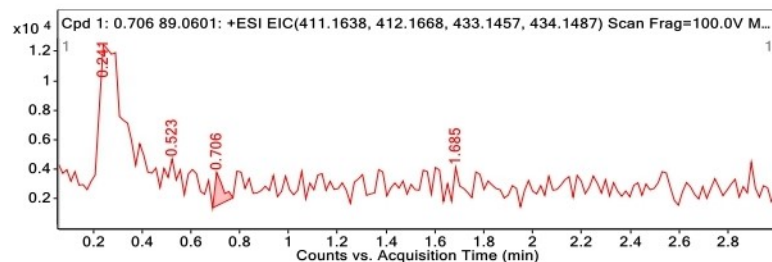**MS Zoomed Spectrum**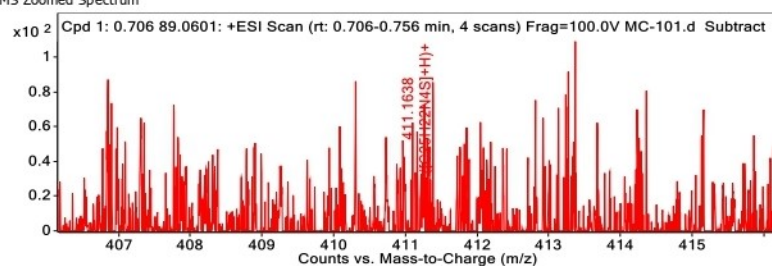**MS Spectrum Peak List**

| m/z      | Calc m/z | Diff(ppm) | z | Abund | Formula   | Ion    |
|----------|----------|-----------|---|-------|-----------|--------|
| 411.1638 | 411.1638 | -0.02     | 1 | 57.97 | C25H22N4S | (M+H)+ |

**Fig. S25** HR-MS spectra of **PTZDCA**

**References**

- 1 B. Mohammadi, H. Kazemi, M. Shafieey, *Monatsh Chem.*, 2014, **145**, 1649–1652.

END
